# Supplementary material for: Physical insights into salicylic acid release from poly(anhydrides)
Source: Royal Society of Chemistry journal article supplement (doi:10.1039/c5cp06858d), 2015-12-08
Supplement: c5cp06858d1.pdf [file c5cp06858d1.pdf]

**“For Supplementary Information Use Only”**

**Physical insights into salicylic acid release from poly(anhydrides)**

**Queeny Dasgupta<sup>1</sup>, Kaushik Chatterjee<sup>1,2</sup>, Giridhar Madras<sup>3\*</sup>,**

<sup>1</sup>Bioengineering Program, <sup>2</sup>Department of Materials Engineering and <sup>3</sup>Department of Chemical  
Engineering, Indian Institute of Science, Bangalore-560012, India

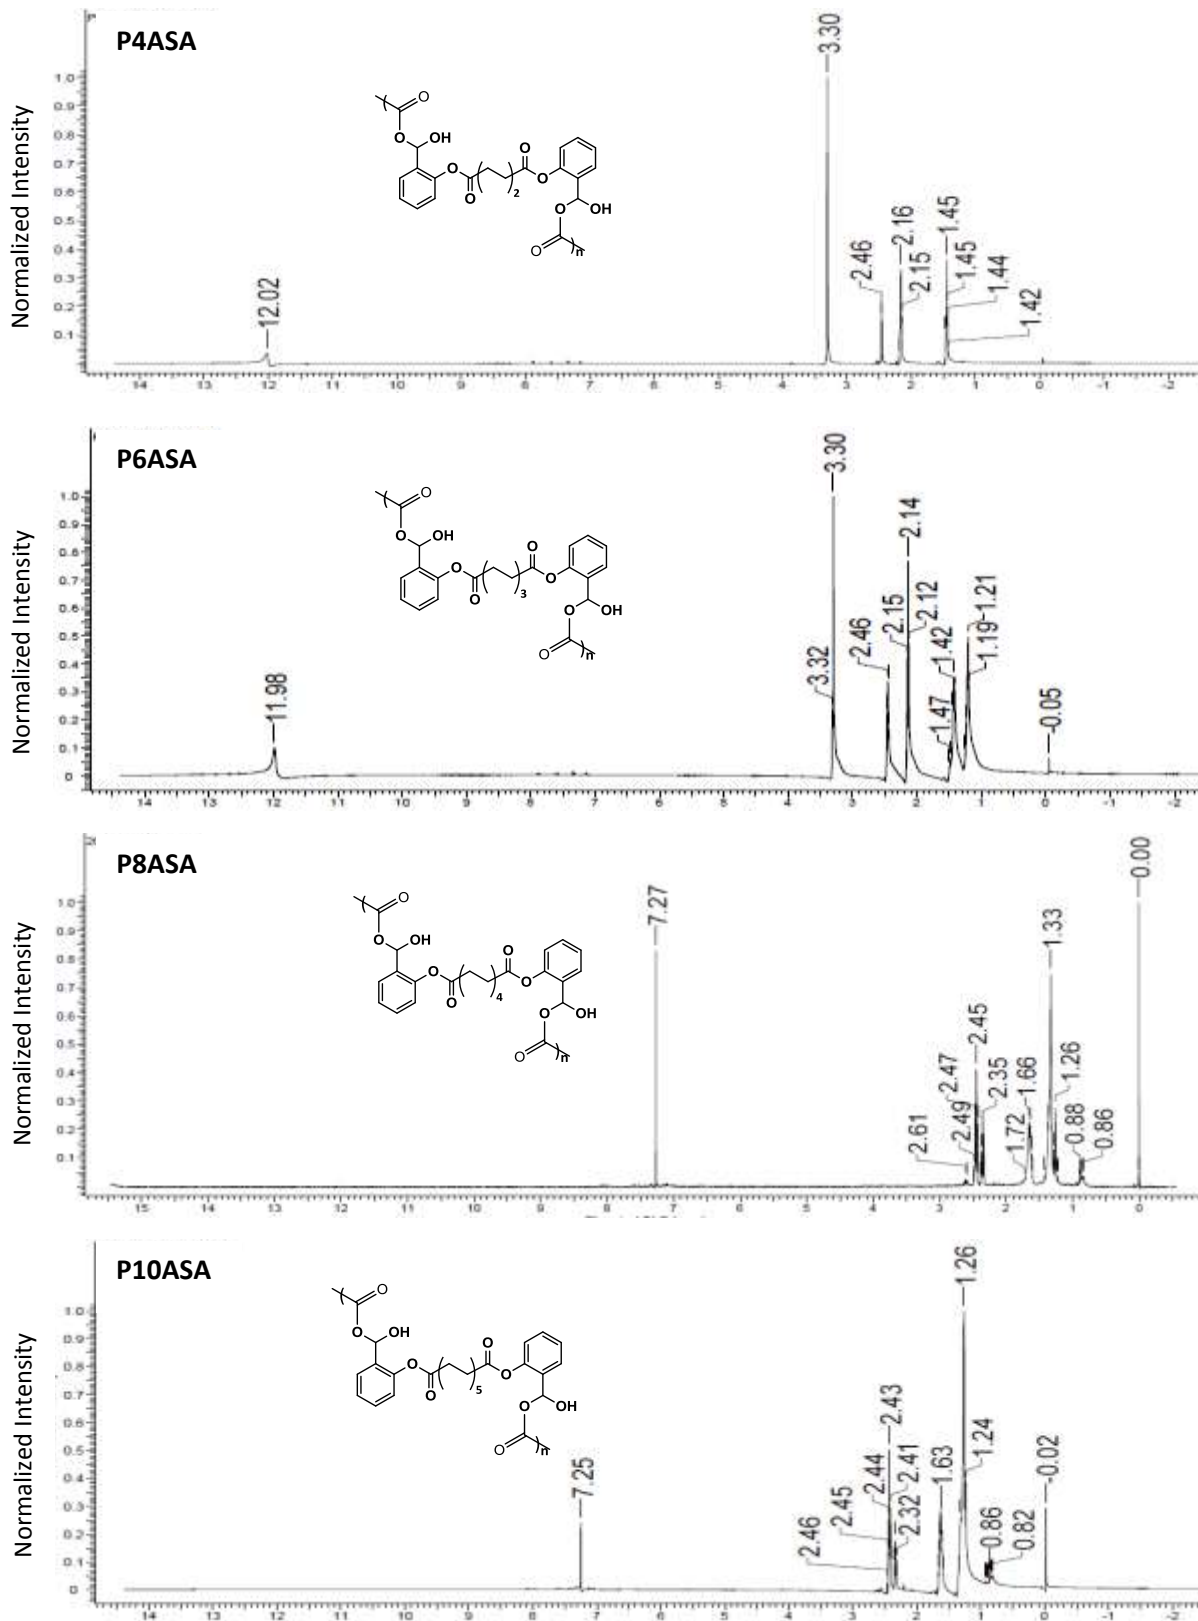

**Figure S1a:**  $^1\text{H}$  NMR spectra of P4ASA, P6ASA, P8ASA and P10ASA.

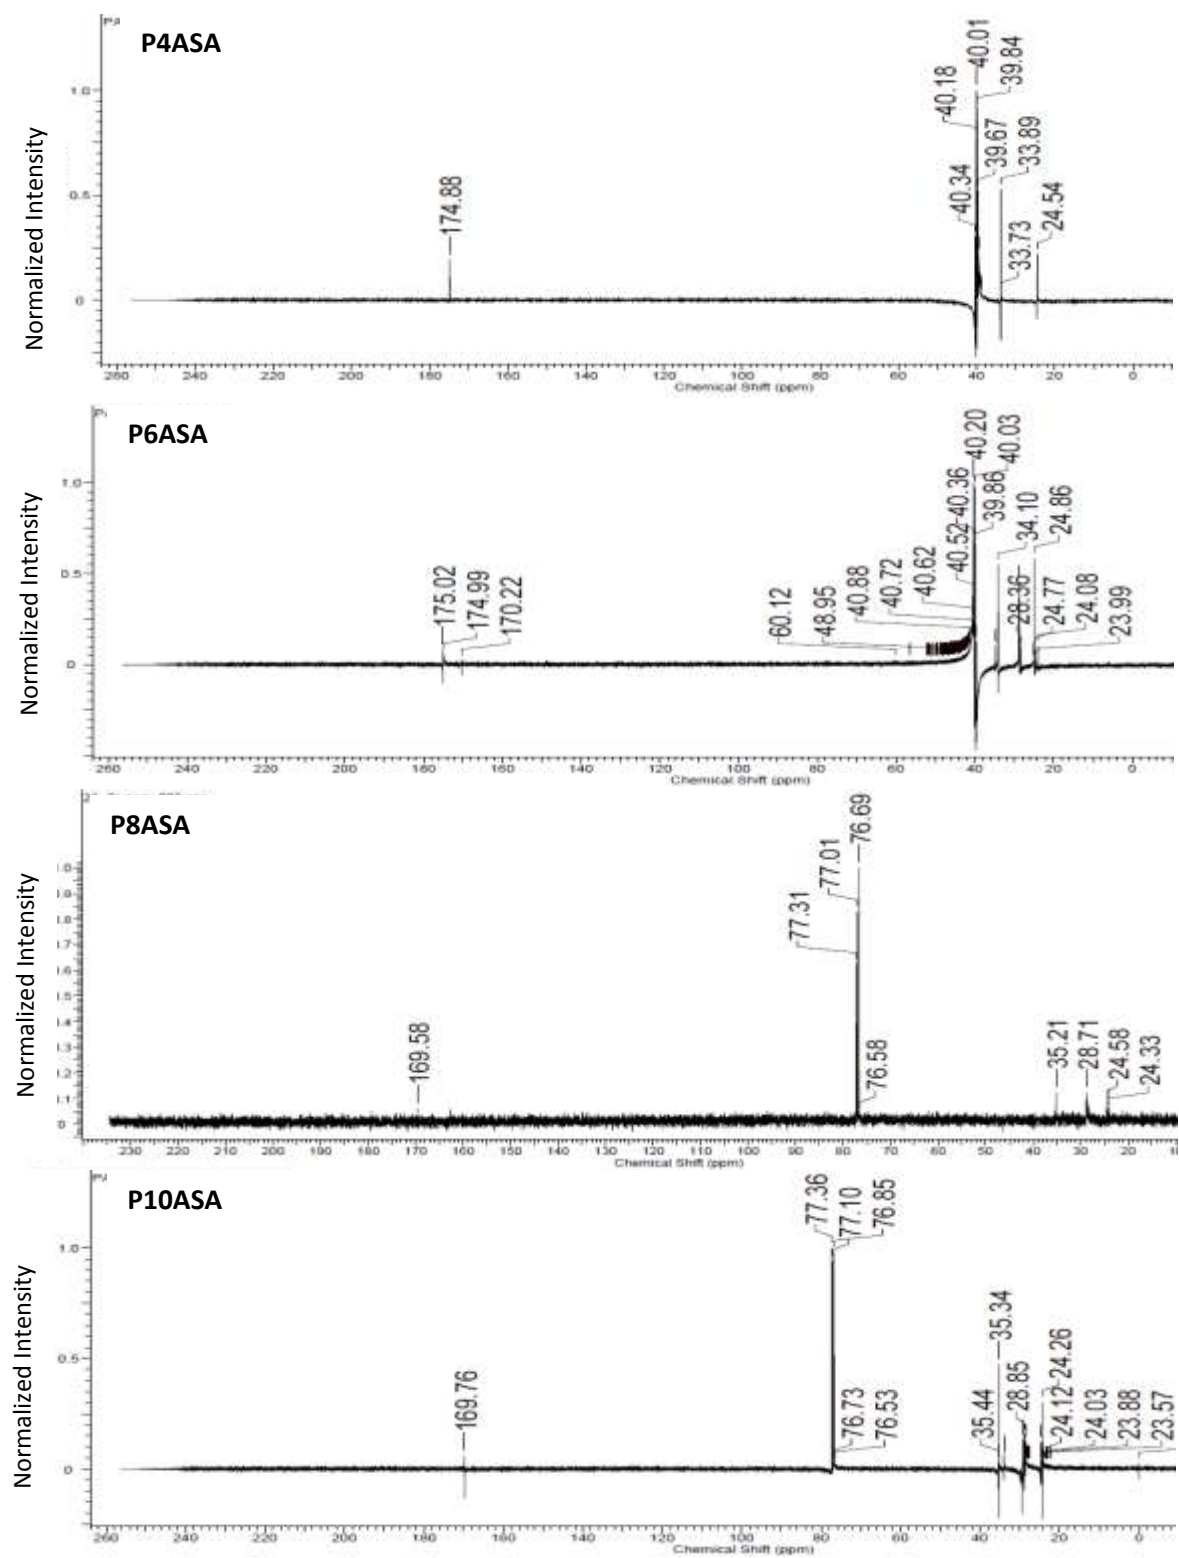

**Figure S1b:**  $^{13}\text{C}$  NMR spectra of P4ASA, P6ASA, P8ASA and P10ASA.

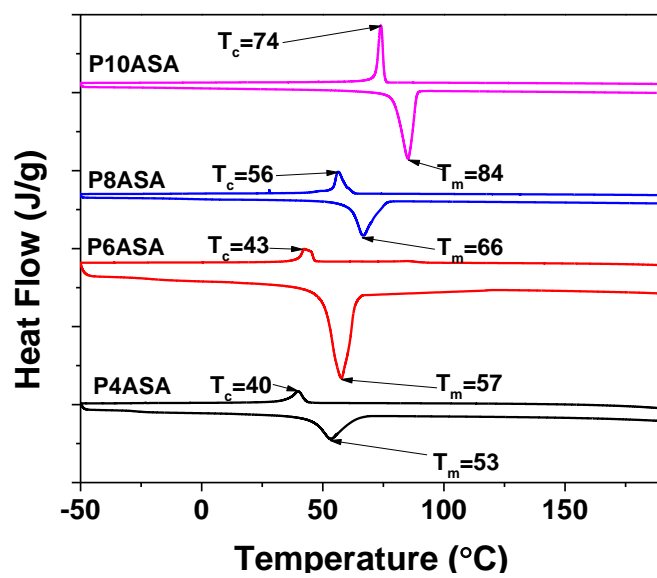

**Figure S2:** DSC thermograms of P4ASA, P6ASA, P8ASA and P10ASA.
